1 **Title: Seasonal gene-expression signatures of delayed fertilization in Fagaceae**

2

3 **Authors: Akiko Satake<sup>1\*</sup>, Kayoko Ohta<sup>1</sup>, Noriko Takeda-Kamiya<sup>2</sup>, Kiminori Toyooka<sup>2</sup>, Junko**

4 **Kusumi<sup>3</sup>**

5

6 **Affiliations:**

7 <sup>1</sup> Department of Biology, Faculty of Science, Kyushu University, Fukuoka 819-0395, Japan.

8 <sup>2</sup> Technology Platform Division, Mass Spectrometry and Microscopy Unit, RIKEN Center for

9 Sustainable Resource Science, Yokohama 230-0045, Japan

10 <sup>3</sup> Department of Environmental Changes, Faculty of Social and Cultural Studies, Kyushu University,

11 Fukuoka 819-0395, Japan.

12

13

14 **Abstract**

15 **In the family Fagaceae, fertilization is delayed by several weeks to one year after pollination,**  
16 **leading to one- or two-year fruiting species depending on whether fruiting occurs in the same**  
17 **or the next year after flowering. To investigate physiological responses underlying the**  
18 **regulation of delayed fertilization, we monitored seasonal changes in genome-wide gene**  
19 **expression in tissues including leaves and buds over two years under natural conditions in one-**  
20 **(*Quercus glauca*) and two-year fruiting species (*Lithocarpus edulis*). Genes associated with the**  
21 **responses to cold stress, photosynthesis, and cell proliferation, which are essential for survival**  
22 **and growth, showed highly conserved seasonal expression profiles regardless of species.**  
23 **However, seasonal expression profiles diverged between the one- and two-year fruiting species**  
24 **in genes associated with pollination, an important process contributing to the origin and**  
25 **maintenance of the reproductive barrier between plant species. By comparing seasonal**  
26 **progression of ovule development and gene expression in pistillate flowers, we revealed that**  
27 **ovules started developing after winter in the two-year fruiting species, which could be linked to**  
28 **the activation of genes involved in fertilization and female gametophyte development after**  
29 **winter. These findings suggest that the two-year fruiting species may have evolved a**  
30 **requirement of winter cold to prevent fertilization before winter and facilitate fertilization and**  
31 **embryo development in the following spring when temperature rises. This study offers new**  
32 **possibilities to explore the evolution of reproductive strategies in Fagaceae.**

33

## 34 1 Introduction

35 Successful fertilization is the start of a new individual in sexual reproduction. In flowering plants,  
36 pollen grains (male gametophytes) arriving on the stigma germinate, and pollen tubes grow to fertilize  
37 the egg cell of the female gametophyte generally within 24 to 48 h or even less (Williams, 2008).  
38 However, a delay in fertilization more than 4 days was recorded over a century ago (Benson, 1894)  
39 and has since been reported in diverse taxa, including Fagales, Brassicales, Laurales and others (Sogo  
40 & Tobe, 2006). The family Fagaceae, the most diverse tree family in northern temperate regions,  
41 including oaks and beeches, contains an exceptional number of species with delayed fertilization  
42 (Satake & Kelly, 2021). A lapse in time between pollination and fertilization spans from several  
43 weeks to almost one year. Species in the genus *Fagus* fertilize their ovules five weeks after pollination  
44 (Sogo & Tobe, 2006), resulting in fruiting in the same year as flowering (one-year fruiting). In the  
45 genus *Lithocarpus*, 92% of 104 species ripen their fruits in the year after pollination (two-year  
46 fruiting; Satake & Kelly, 2021). The genus *Quercus* comprises a mixture of one- and two-year fruiting  
47 species (Satake & Kelly, 2021).

48 Satake & Kelly (2021) presented a hypothesis that explains the coevolution of  
49 flowering/fruitle phenology and delayed fertilization. They developed a mathematical model that  
50 takes into account the impact of winter seasons, which are unfavorable for reproduction, as well as  
51 competition for pollinators. By incorporating data on reproductive phenology, they were able to  
52 explore how these factors influence the evolution of fertilization timing. When flowering occurs late  
53 in the season, particularly during summer or fall, it can be challenging to achieve complete seed

54 maturation before the onset of the cold winter season for Fagaceae species that produce large acorns.  
55 The mathematical model has predicted that a strategy of delaying fertilization until after the winter  
56 season could evolve as a way to overcome this challenge (Satake and Kelly 2021). The theoretical  
57 prediction suggests that the appropriate response to seasonal environmental changes, particularly the  
58 response to cold winter, is important for adjusting the fertilization time and aligning it with other  
59 phenological traits such as flowering and fruiting time. However, little is known about what  
60 physiological responses underlie the regulation of fertilization timing and how they differ between  
61 one-year and two-year fruiting species.

62         The physiological responses to seasonal environmental changes can be studied at the  
63 molecular level using the molecular phenology approach (Kudoh, 2016), which monitors the seasonal  
64 dynamics of global gene expression profiles in leaves and buds under natural conditions. Recent  
65 technological advances in the field of genomics have made it possible to obtain time-course  
66 transcriptome data in natural settings in non-model organisms such as Fagaceae (Satake et al. 2022).  
67 Molecular phenology has been used to unravel gene expression patterns that govern plant phenology  
68 in a wide range of species, including herbs (Aikawa et al. 2010; Nagano et al., 2019, 2012; Richards  
69 et al., 2012; Satake et al., 2013), trees in temperate areas (Cronn et al., 2017; Jokipii-Lukkari et al.,  
70 2018; Lu, Gordon, Amarasinghe, & Strauss, 2020; Miyazaki et al., 2014; Satake, Kawatsu, Teshima,  
71 Kabeya, & Han, 2019), and trees in the tropics (Kobayashi et al., 2013; Yeoh et al., 2017).

72         To investigate gene-expression signature of delayed fertilization, here we present the  
73 comparative molecular phenology over two years in one- and two-year fruiting species of the

74 Fagaceae family. The one-year fruiting species is *Q. glauca* that starts blooming in April and fruits  
75 in the autumn in the same year as anthesis (Fig. 1a). The two-year fruiting species, *L. edulis*, begins  
76 flowering mainly in June with a minor flowering event in fall (Fig. S1) and fruits in the next year  
77 after flowering (Fig. 1b). Two genera, *Quercus* and *Lithocarpus*, diverged during the Paleocene  
78 (Manos & Stanford, 2001; Zhou et al., 2022) and diversified in North America and Asia, respectively.  
79 We show that performing comparative transcriptomics using these two genera in the same natural  
80 habitat is a powerful approach to identify evolutionary conservation and divergence of physiological  
81 responses to environmental changes.

82

## 83 **2 Materials and Methods**

### 84 **2.1 Study site and sampling methods**

85 The study site is in the biodiversity reserve of the Ito campus of Kyushu University (33°35' 47.5" N,  
86 130°12' 50.0" E) situated in Fukuoka, southern Japan. The biodiversity reserve of the Ito campus  
87 occupies an area of approximately 37 ha at an elevation from 20 to 57 m a.s.l. The mean annual  
88 precipitation and temperature near the site are 1701.0 mm and 16.4 °C, respectively (Japan  
89 Meteorological Agency <http://www.jma.go.jp/jma/indexe.html> for 1991–2020). We studied two  
90 evergreen species, *Q. glauca* and *L. edulis*, which are endemic to Asia. The flowers are self-  
91 incompatible and wind-pollinated in *Q. glauca*, while they are animal pollinated in *L. edulis*.

92 We first characterized the seasonal dynamics of global transcriptomics every four weeks using  
93 a mixture of leaf and bud tissues over two years because molecular phenology data in floral tissues

94 are available for only several months in one-year fruiting species, which is too short to compare the  
95 seasonal progression of gene expression between species. To monitor the molecular phenology, we  
96 collected samples from three individuals each for *Q. glauca* (Q1, Q2, and Q3) and *L. edulis* (L1, L2,  
97 and L3; Fig. S2). The mean ( $\pm$  s.d.) diameter at breast height (DBH) of *Q. glauca* and *L. edulis* were  
98 17.53 ( $\pm$ 1.10) cm and 10.04 ( $\pm$ 1.51) cm, respectively. We collected a pair of leaf and apical bud from  
99 three current-year shoots per individual every four weeks from May 2017 to February 2019 (sampling  
100 dates are provided in Table S1). The pistillate flowers were sampled from three branches per  
101 individual from June 2020 to June 2021 in *L. edulis* and from April 2021 to Jun 2021 in *Q. glauca*  
102 (Table S1). Samples were taken from the sun-exposed crown (approximately 4 m and 2 m from the  
103 ground for *Q. glauca* and *L. edulis*, respectively) using long pruning shears from 11:30 to 12:30 h.  
104 For each sample, 0.2–0.4 g of tissue was preserved in a 2 ml microtube containing 1.5 ml of RNA-  
105 stabilizing reagent (RNAlater; Ambion, Austin, TX, USA) immediately after harvesting. The samples  
106 were transferred to the laboratory within 3 hr after sampling, stored at 4 °C overnight and then stored  
107 at –80 °C until RNA extraction. During transport to the laboratory, the samples were kept in a cooler  
108 box with ice to maintain a low temperature.

109

## 110 **2.2 RNA extraction**

111 Total RNA was extracted in accordance with the method described in a previous study (Miyazaki et  
112 al., 2014). RNA was extracted independently from leaf and bud samples of each tree and pooled at  
113 each time point. Similarly, RNA was extracted independently from each pistillate flower sample.

114 RNA integrity was examined using the Agilent RNA 6000 Nano kit on a 2100 Bioanalyzer (Agilent  
115 Technologies), and the RNA yield was determined using a NanoDrop ND-2000 spectrophotometer  
116 (Thermo Fisher Scientific). The RNA integrity number (RIN) is listed in Table S2.

117

### 118 **2.3 Generation of transcriptome next-generation sequencing (NGS) data**

119 We obtained transcriptome data from our samples to design DNA microarray probes. We used eight  
120 samples collected monthly from one individual at the study site from May to December 2017 for *Q.*  
121 *glauca* and from June to December 2017 for *L. edulis* (Table S1). Five to six micrograms of total  
122 RNA (RNA mixed with equal amounts of RNA extracted from each of the leaves and buds of the  
123 same tree) was sent to Macrogen (South Korea), where a cDNA library was prepared with an Illumina  
124 TruSeq Sample Prep Kit, and paired-end transcriptome sequencing of each sample was conducted  
125 using an Illumina HiSeq2000 or NovaSeq6000 sequencer (Illumina, San Diego, CA, USA). A total  
126 of 299 and 313 million 100-bp paired-end reads were obtained for each species. De novo  
127 transcriptome assembly was conducted using Trinity version 2.0.6 (Grabherr et al., 2011). Read  
128 quality analysis was performed on the raw data using FastQC v0.11.7  
129 (<http://bioinformatics.babraham.ac.uk/projects/fastqc/>). Quality trimming and adapter clipping were  
130 performed using Trimmomatic version 0.38 (Bolger, Lohse, & Usadel, 2014) to trim trailing bases  
131 below the average quality 15 and minimum length 36 and clip Illumina adapters. The resulting reads  
132 shorter than 50 bp were discarded. De novo transcriptome assembly was conducted using Trinity  
133 version 2.0.6 (Grabherr et al., 2011).

134

## 135 **2.4 Probe design for the DNA microarray**

136 For the custom microarray slides, we used the assembled sequences of the transcripts generated by  
137 the NGS described above. We selected the assembled sequences for array design based on two steps.  
138 We first extracted transcript sequences that showed high homology against *A. thaliana* (%Identity >=  
139 40%, qcovhsp >= 40%) by BLASTX searches for each species. For each extracted transcript sequence,  
140 the top hit *A. thaliana* gene ID was selected. If multiple transcript sequences were annotated for the  
141 same *A. thaliana* gene ID, the longest transcript was selected. We obtained 19,290 and 19,426  
142 transcript sequences for *Q. glauca* and *L. edulis*, respectively. In the second step, to select transcript  
143 sequences that are conserved across genera in the Fagaceae family, we extracted transcript sequences  
144 that were eliminated from the homology selection, but the sequence homology to *F. crenata* transcript  
145 sequences used for DNA microarray (Satake et al., 2019) was high (%Identity >= 60%, qcovhsp >=  
146 60%, e-value cut-off:  $10^{-5}$ ) in BLASTX searches for each species. After the selection in step 2, we  
147 obtained additional 3,474 and 4,357 transcript sequences for *Q. glauca* and *L. edulis*, respectively.  
148 We pooled these transcript sequences for each species and designed the array using the e-array portal  
149 for array design hosted by Agilent (<https://earray.chem.agilent.com/earray/>) based on 22,764 and  
150 23,783 transcript sequences for *Q. glauca* and *L. edulis*, respectively. Two probes were designed for  
151 each transcript sequence. After removing probes with redundant sequence, 42,121 and 42,436 probes  
152 were installed in the 8×60K array format.

153



## 154 **2.5 Microarray analysis**

155 One hundred nanograms of total RNA extracted from the leaves and buds of each sample was  
156 amplified, labelled, and hybridized to a 60K Agilent 60-mer oligomicroarray in accordance with the  
157 manufacturer's instructions for each sample for each time point based on the one-colour method. The  
158 hybridized microarray slides were scanned by an Agilent scanner. The relative hybridization  
159 intensities and background hybridization values were calculated using Agilent Feature Extraction  
160 Software (9.5.1.1). Among the two probes designed for each transcript sequence, we selected the  
161 probe with the largest median. Finally, we obtained time-series data of 15,451 and 15,182  
162 independent probes for *Q. glauca* and *L. edulis*, respectively.

163

## 164 **2.6 Prediction of orthologous genes**

165 To identify orthologous genes across *Q. glauca* and *L. edulis*, we first used TransDecoder  
166 (<http://transdecoder.sourceforge.net/>) to detect coding regions from the RNA seq assembled contigs.  
167 To maximize the sensitivity to capture coding regions with functional significance, we scanned all  
168 coding regions detected by TransDecoder for the blastp or pfam searches. We used the protein  
169 sequence database of green plants (Viridiplantae) for homology searches with an e-value  $< 10^{-5}$ .  
170 Among the assembled contigs of *Q. glauca* and *L. edulis*, TransDecoder identified 101,371 and  
171 86,128 contigs containing candidate coding regions with homology to known proteins. The longest  
172 predicted protein sequences of candidate coding regions were used for subsequent analysis. The  
173 construction of groups of orthologous genes (orthogroups, referred to here as gene families including

174 orthologue pairs) was performed for five plant species: *Q. glauca*, *L. edulis*, *Fagus crenata* (75,926  
175 sequences reported in Satake et al. 2019) and *Q. robur* (25,808 sequences from OAK GENOME  
176 SEQUENCING <http://www.oakgenome.fr>), and *Arabidopsis thaliana* (48,359 sequences from TAIR  
177 <https://www.arabidopsis.org>).

178 The prediction of orthogroups was based on a blastp all-against-all comparison of the protein  
179 sequences (e-value <  $10^{-5}$ ) of these species, followed by clustering with OrthoFinder (Emms & Kelly,  
180 2015, 2019). We obtained 32,149 orthogroups in total and then considered a pair of probes of the two  
181 species (*Q. glauca* and *L. edulis*) for which sequences belonged to an identical orthogroup to be  
182 orthologous genes. However, certain pairs of probes could not be assigned to be orthologous due to  
183 multiple partners within an orthogroup. Additionally, pairs of probes that belonged to an orthogroup  
184 lacking the sequence of *A. thaliana* were excluded due to the uncertainty of their function. Finally,  
185 we obtained 9,258 pairs of probes predicted to be orthologous genes (Table S3). The GO terms of  
186 predicted proteins (orthogroups) were retrieved from annotation data of *A. thaliana*. We removed  
187 probes with low signal and weak correlation between individuals using the following three criteria:  
188 (1) no signal over all time points, (2) the mean signal value over all time points is lower than 0.05,  
189 and (3) the mean of correlation between each pair of individuals is smaller than 0.2. A total of 7,707  
190 pairs among the 9,258 pairs satisfied the criteria. We used time series data of these 7,707 probes for  
191 further analyses after normalization to a mean of zero and a standard deviation of one for each species.

192

## 193 **2.7 Hierarchical clustering**

194 To assess the similarity of the genome-wide transcriptional profiles across orthologous genes, we  
195 performed hierarchical clustering using the monthly time series data of 7,707 orthologous genes from  
196 March 2017 to February 2019. For each orthologous gene, there were 24 time points, with three  
197 individuals each, for *Q. glauca* and *L. edulis*. We calculated the mean expression levels of each  
198 orthologous gene across three individuals in each species and subsequently normalized the values by  
199 adjusting the mean to zero and the standard deviation to one. We performed hierarchical clustering  
200 using the Ward method and the Euclidian distance using the hclust function in R (ver. 3.6.1).

201

## 202 **2.8 Principal component analysis (PCA)**

203 To assess the seasonal expression dynamics of 7,707 orthologous genes, we performed PCA of the  
204 gene expression profiles from all samples using the function prcomp of the stats package in R (ver  
205 3.6.1). To investigate the genes and functions that most contribute to each principal component, we  
206 extracted the top 2.5% of genes from the largest positive ( $n = 176$ ) and negative loading values ( $n =$   
207  $176$ ) for each axis. Then, to test the enrichment of GO terms in each principal component, we  
208 performed Fisher's exact tests (two-sided) using the fisher.test function in R (ver 3.6.1). After the  
209 Fisher's exact tests, we controlled for the false discovery rate using Storey's  $Q$ -value method (Storey,  
210 2002) and estimated the  $Q$ -value of each test using the qvalue package in R (ver 3.6.1). To test the  
211 significance of the PCA loadings, we used the bootstrapped eigenvector method (Jackson, 1995;  
212 Peres-Neto et al., 2003). Using this method, we confirmed that all the top 2.5% of genes with positive  
213 or negative loading values that characterize each axis are considered significant contributors.

214

## 215 **2.9 Gene ontology (GO) enrichment analysis**

216 To inspect functions of genes for each cluster or those in the top 2.5% of genes that contribute to each  
217 of the three principal components, GO enrichment analysis was performed. The 7,707 orthologous  
218 genes were selected as a customized reference for the analysis. The list of GO terms for describing  
219 the biological process were retrieved from the Database for Annotation, Visualization, and Integrated  
220 Discovery (DAVID) (Dennis et al., 2003). Statistical tests for enrichment were performed using  
221 Fisher's exact tests (`fisher.test` function) in R (ver 3.6.1). We controlled for the false discovery rate  
222 using Storey's  $Q$ -value method (Storey, 2002) and estimated the  $Q$ -value of each test using the `qvalue`  
223 package in R (ver 3.6.1). The GO terms ~~from~~ with the top-5 lowest  $P$  value were selected for  
224 representation (Supplementary Tables 4 and 5).

225

## 226 **2.10 Phylogenetic analysis**

227 Based on GO enrichment analyses, we identified three candidate genes, *Secretary (SEC)5A*  
228 (AT1G76850), *SEC15B* (AT4G02350) and *RNA-dependent RNA polymerase 6 (RDR6: AT3G49500)*,  
229 that may contribute to the regulation of delayed fertilization. The phylogenetic tree for each of three  
230 genes was reconstructed based on the protein sequences of *A. thaliana*, *Oryza sativa*, three *Quercus*  
231 species, *L. edulis* and *F. crenata* with *Physcomitrella patens* ~~was used~~ as an outgroup. Sequences of  
232 *SEC5A*, *SEC15B*, and *RDR6* genes for *O. sativa*, *Q. suber*, and *P. patens* were obtained from OrthoDB  
233 release 10 (<https://www.orthodb.org/>) (Kriventseva et al., 2019). Database searches were conducted

234 using annotation keywords or identifiers of the TAIR database. The ortholog sequences of each gene  
235 were aligned using muscle implemented in MEGA X (Kumar et al., 2016). Maximum likelihood  
236 (ML) trees were constructed with 1,000 replicates for bootstrapping using RAxML v8.2.11  
237 (Stamatakis, 2014) via raxmlGUI 2.0.10 platform (Edler, Klein, Antonelli, & Silvestro, 2021). For  
238 each ML estimation, the best substitution model was used, as determined by model testing conducted  
239 with ModelTest-NG version 0.1.7 (Darriba et al., 2020) via the raxmlGUI 2.0.10 (Edler et al., 2021).  
240 The resulting ML trees were visualized using Figtree version 1.44  
241 (<http://tree.bio.ed.ac.uk/software/figtree/>).

242

## 243 **2.11 RT-qPCR**

244 Pistillate flower samples collected from *L. edulis* from June 2020 to June 2021 were used for RT-  
245 qPCR analysis. Because pistillate flowers are fertilized in a relatively short period in *Q. glauca*, we  
246 used pistillate flower samples from April 2021 to June 2021 for RT-qPCR analysis in *Q. glauca*. We  
247 quantified the expression levels of *SEC5A*, *SEC15B*, and *RDR6* using the expression level of *UBQ10*  
248 as a reference and the Bio-Rad CFX connect real-time PCR detection system (CRX96 Touch). cDNA  
249 synthesis was carried out using PrimeScript<sup>TM</sup> RT reagent kit with gDNA Eraser (Takara, Japan) from  
250 250 ng total RNA. The first strand cDNAs were diluted to 10 times for subsequent use. Gene specific  
251 real-time PCR was performed using 5 ng of cDNA and SsoFast<sup>TM</sup> EvaGreen® Supermix kit (Bio-  
252 Rad, Hercules, CA, USA) according to the manufacturer's instructions. The PCR condition was as  
253 follows: 95 °C for 2 min, followed by 40 cycles of 95 °C for 1 s, 60 °C for 5 s, and the fluorescent

254 signal was measured at the extension step. Melt curve analyses was carried out to validate the  
255 specificity of the PCR amplicons. All test cDNAs were run in duplicates for each gene, and the  
256 average was used for analysis. The relative expression level of *UBQ10* was normalized to the standard  
257 sample by using the comparative threshold cycle ( $\Delta\Delta C_t$ ) method (Pfaffl, 2001). Gene specific primers  
258 were designed using Primer3 software (<http://primer3.wi.mit.edu/>), and confirmed by the observation  
259 of a single amplification product of the expected size and sequences. The PCR amplification  
260 efficiencies ranged from 102% for to 112% with  $R^2 > 0.98$ . At each time point, there are three  
261 biological replicates and two technical replicates for each species. We used *UBQ10* as a housekeeping  
262 gene because previous studies showed that the expression of *UBQ10* is stable in *F. crenata* (Miyazaki  
263 et al., 2014; Miyazaki & Satake, 2017). The mean ( $\pm$  s.d.) Ct values of *QgUBQ10* and *LeUBQ10* in  
264 pistillate flowers were 22.0 ( $\pm$  0.51) and 24.75 ( $\pm$  0.77), respectively. The primers used for RT-qPCR  
265 are listed in Table S4.

266

## 267 **2.12 Histological analysis of ovule development**

268 Pistillate flowers in different stages of development were fixed with 4% (w/v) formaldehyde, 2%  
269 (v/v) glutaraldehyde, and 0.05 M cacodylate buffer, dehydrated in an ethanol dilution series, and  
270 embedded in LR-white resin (Electron Microscopy Science). Sections (1- $\mu$ m thick) were prepared  
271 with an ultramicrotome (Leica Microsystems EM-UC7) using a diamond knife (DIATOME Histo).  
272 Each section was stained with 0.05% (w/v) toluidine blue and observed with an upright light  
273 microscope with 20x objective lens (Olympus BX53 M and DP26 digital camera).

274

## 275 **3 Results**

### 276 **3.1 Winter and summer transcriptional profiles are distinctly different, but spring and** 277 **fall are similar**

278 Our global transcriptomic data show clear seasonal dynamics (Fig. 2a). Most orthologues show highly  
279 correlated seasonal expression profiles between species (mean of Pearson correlation = 0.39)  
280 compared with those calculated from a set of randomly paired genes (mean of Pearson correlation =  
281 0.0096;  $P < 10^{-16}$ ; Wilcoxon test; Fig. S3). Hierarchical clustering of the monthly expression profiles  
282 revealed clustering of winter months (December, January, February, March) and other seasons  
283 regardless of species (Fig. 2a). The transcriptional profiles other than winter were divided into  
284 summer months (June, July, August, and September) and spring (April, May, June) or fall (October  
285 and November) (Fig. 2a). The expression profiles were similar between spring and fall regardless of  
286 the different pheno-phases (bud burst and flowering in spring and fruiting in fall).

287

### 288 **3.2 Genome-wide molecular phenology is associated with seasonal change in** 289 **temperature, not for photoperiod and rainfall**

290 We found a clear relationship between the transcriptional profiles and seasonal temperature change.  
291 A winter transcriptional profile was observed when the mean temperature over the 2 weeks prior to  
292 the monitoring date was lower than 11.3 °C (Fig. 2b), and summer transcriptional profiles appeared  
293 when the mean temperature exceeded 22.7 °C. Between these temperature thresholds, spring and fall

294 transcriptional profiles were observed (Fig. 2b). The photoperiod and precipitation were not well  
295 associated with seasonal transcriptional profiles (Fig. 2c, d). The photoperiod cannot be used to  
296 distinguish the differences in transcriptional profiles between spring and summer or those between  
297 fall and winter (Fig. 2c). Precipitation fluctuates heavily across months and years, which is different  
298 from the seasonal transcriptional profiles (Fig. 2d). These results suggest that temperature is a major  
299 driver of seasonal transcriptional dynamics.

300 Hierarchical clustering of the seasonal expression of individual genes showed that 1,942  
301 genes were highly expressed only in winter (called winter genes) in both *L. edulis* and *Q. glauca*  
302 (Cluster 1 in Fig. 3). The biological function of winter genes was enriched by Gene Ontology (GO)  
303 terms associated with metabolism (Table S5), implying metabolic changes in response to winter cold.  
304 A total of 1,566 genes were highly or moderately expressed in spring and fall (called spring-fall  
305 genes) in both species (Cluster 2 in Fig. 3), in which GO terms associated with the cell cycle and cell  
306 division were enriched (Table S5), suggesting active cell proliferation in spring or fall seasons. The  
307 majority of genes (2,117 genes) were highly expressed in summer (called summer genes) in both  
308 species (Cluster 3 in Fig. 3). The top GO term was “Oxidation–Reduction Process”, suggesting the  
309 response to oxidative stress caused by high light and drought in summer (Table S5). The remaining  
310 genes, which accounted for 27% of all orthologous genes, showed differential expression between  
311 species (Fig. 3). A total of 1,004 genes were expressed in winter in *Q. glauca* but expressed in spring  
312 and summer in *L. edulis* (called type 1 differentially expressed genes (DEGs); Cluster 4 in Fig. 3),  
313 while 1,078 genes were expressed in winter in *L. edulis* but expressed in spring and summer in *Q.*



314 *glauca* (called type 2 DEGs; Cluster 5 in Fig. 3). The top five GO terms for type 1 and 2 DEGs  
315 included “Oxidation–Reduction Process” and “Pollination”, respectively (Table S5).

316

317 **3.3 Seasonal gene expression profiles are conserved for the cold stress response,**  
318 **energy acquisition and cell proliferation but diverge for pollination across the two**  
319 **species**

320 To identify and quantify the major axes of the seasonal gene expression profiles, we performed PCA.  
321 We found that the first three axes of variation (the principal components; PCs) explain 41.3% of the  
322 multidimensional functional space variation (Fig. 4a, b; Fig. S4). The first axis (PC1) accounted for  
323 24.32% of the variation and distinguished gene expression profiles between winter and other seasons  
324 (Fig. 4a, c). The second axis (PC2) accounted for 10.58% of the variation and separated ~~distinguishes~~  
325 gene expression profiles between spring/fall and summer (Fig. 4a, d). Together, the first and second  
326 axes represent conserved gene expression dynamics across the two species. In contrast, the third axis  
327 (PC3) accounted for 6.45% of the variation and captured the differential gene expression dynamics  
328 across the two species (Fig. 4b, e).

329 To identify the key genes responsible for defining each of the three axes, we selected the top  
330 2.5% of genes ( $n = 176$  for each axis) with the largest positive and negative loading values. This  
331 selection was based on a validation of the significance of each gene's contribution to each axis. The  
332 biological functions of the top 2.5% of genes that characterized the first axis with positive loading  
333 were enriched by the GO term “Macromolecule Metabolic Process” (Table S6), which is consistent

334 with the GO term identified in the winter cluster Table S5). Genes associated with cold adaptation  
335 (e.g., *Arabidopsis thaliana* DEAD-box RNA helicase: *AtRH7*: AT5G62190) (Huang et al., 2016; Liu  
336 et al., 2016), freezing tolerance (e.g., *STARCH EXCESS 1*: *SEXI*: AT1G10760) (Yano et al., 2005;  
337 Yu et al., 2001), and proteome and RNA homeostasis (e.g., *Clp protease ATP-binding subunit*:  
338 *CLPCI*: AT5G50920) (Nishimura & Van Wijk, 2015; Sjögren, MacDonald, Sutinen, & Clarke, 2004)  
339 are included in this GO term (Fig. 5; Table S7), which suggests that the first axis is functionally  
340 characterized by the stress response to winter cold. The biological functions of the top 2.5% of genes  
341 that characterized the second axis with positive or negative loading were enriched in several GO  
342 terms associated with photosynthesis and cell division (Tables S6, S7). The genes associated with  
343 photosynthesis were highly expressed in summer (e.g., *STN7*: AT1G68830) (Bellaflore et al., 2005),  
344 and those associated with cell division showed an expression peak in spring (e.g., *A. thaliana*  
345 *RADiation54*: *AtRAD54*: AT3G19210 and *METHYLTRANSFERASE1*: *MET1*: AT5G49160; Fig. 5)  
346 (Kankel et al., 2003; Osakabe et al., 2006). This result suggests that the second axis is characterized  
347 by energy acquisition and growth. Increased expression of DNA repair and methylation in spring can  
348 be the response to DNA replication stress during leaf flushing and growth (Fig. 1). The slight delay  
349 in the expression peaks of *MET1* and *AtRAD54* in *L. edulis* (Fig. 5) can be explained by the delayed  
350 timing of leaf flushing in *L. edulis*.

351 The enriched GO terms for the top 2.5% of genes for the third axis with negative loading  
352 include “Cell Communications” and “Pollination” (Table S6), consistent with the GO term identified  
353 as Type 2 DEGs (Table S5). Because genes included in the GO term “Pollination” could be associated

354 with delayed fertilization, we conducted further analyses on these genes. All eight genes included in  
355 the GO term “Pollination” were found to overlap with the genes identified as Type 2 DEGs (Tables  
356 S5, S7). Among the eight genes, four genes encode membrane associated proteins, Niemann-Pick  
357 type C protein (NPC1-2: AT4G38350), G-type lectin S-receptor-like protein kinase (AT2G19130),  
358 and receptor-like protein kinase2 (RPK2: AT3G02130), and signal peptide peptidase (SPP:  
359 AT2G03120), involved in sphingolipid trafficking (Feldman, Poirier, & Lange, 2015), anther  
360 development (Mizuno et al., 2007), protein secretion (Han, Green, & Schnell, 2009) (Table S7).  
361 Purple acid phosphatase 15 (PAP15: AT3G07130) that is an acidic phosphatase with phytase activity  
362 (Kuang, Chan, Yeung, & Lim, 2009) was also included. The other three genes that are known to be  
363 associated with regulating fertilization on the female side in *A. thaliana*. Among the three genes, two  
364 are associated with exocytosis (*SEC5A* and *SEC15B*: Fig. 5). These genes encode subunits of the  
365 exocyst, an evolutionarily conserved heterooligomeric protein complex (Heider & Munson, 2012).  
366 The exocyst complex tethers and docks vesicles to target membranes (Guo et al., 1999). In *A. thaliana*,  
367 through an RNAi approach, these subunits of the exocyst complex were shown to be required for  
368 conferring stigma receptivity, suggesting the role of exocytosis as a crucial process during pollen  
369 acceptance (Safavian et al., 2015). The last gene is *RDR6* (Fig. 5), which functions in the biogenesis  
370 of trans-acting small interfering RNAs (ta-siRNAs) (Peragine, Yoshikawa, Wu, Albrecht, & Poethig,  
371 2004; Yoshikawa, Peragine, Mee, & Poethig, 2005). Loss-of-function mutations in these genes  
372 exhibit an increased frequency of abnormal gamete precursors that often give rise to development of  
373 more than one female gametophyte in the Arabidopsis ovule (Olmedo-Monfil et al., 2010). Because

374 the association with fertilization has been most thoroughly investigated only in these three genes, we  
375 selected *SEC5A*, *SEC15B*, and *RDR6* for further analysis. Because differential seasonal expression  
376 profiles of these genes could be associated with the difference in the period of delay from pollination  
377 to fertilization, we observed the ovule development by confocal microscopy and compared the ovule  
378 development with the expression of *SEC5A*, *SEC15B*, and *RDR6* in pistillate flowers. Before the  
379 analysis using pistillate flowers, we confirmed that the three genes of *Q. glauca* and *L. edulis* are  
380 found in the clade of corresponding genes of other species in the molecular phylogenetic trees (Figs.  
381 S5–S7).

382

### 383 **3.4 Ovules start developing after winter in two-year fruiting species**

384 The comparative anatomical investigation revealed that *L. edulis* takes 11 months to develop ovules,  
385 which is six times longer than *Q. glauca*. In the pistillate flowers of *Q. glauca*, the locules are already  
386 visible in May, which is one month after flowering and pollination (Fig. 6a). Six ovule primordia  
387 were present, and two dome-shaped ovule primordia arose in each locule (Fig. 6a). These ovule  
388 primordia expanded to fill the locules, and one megaspore mother cell was visible in the transverse  
389 section in June (Fig. 6a). Because embryo development was observed in July (Fig. S8), fertilization  
390 occurred between June and July in *Q. glauca*. In contrast, the pistillate flowers of *L. edulis* were  
391 relatively unchanged over eight months after pollination. The three locules were visible, but the ovule  
392 primordia were not yet differentiated in the transverse section in November (Fig. 6b). After winter,  
393 two dome-shaped ovule primordia arose in each of three locules in March (Fig. 6b). It took an

394 additional two months for the ovules to be well differentiated with megaspore mother cells (Fig. 6b;  
395 Fig. S9). In June, one ovule was successfully fertilized, and the zygote enlarged (Fig. 6b). The rest of  
396 the ovules showed signs of abortion, as inner integuments and internal structures coagulated to form  
397 amorphous, dark-staining structures contained within outer integuments (Fig. 6b).

398

### 399 **3.5 Expression of *SEC5A*, *SEC15B*, and *RDR6* in pistillate flowers increases after** 400 **winter in two-year fruiting species**

401 We compared the seasonal progression of ovule development with the expression profiles of *SEC5A*,  
402 *SEC15b*, and *RDR6* in pistillate flowers quantified by RT-qPCR. The expression of these genes in *L.*  
403 *edulis* peaked from March to May after winter (Fig. 6c), which is several months later than the peak  
404 of leaf and bud tissues (Fig. 5) and coincides with the onset of ovule primordia development (Fig.  
405 6b). The expression of *SEC5A* and *SEC15B* in *L. edulis* showed two other minor peaks in July and  
406 October (Fig. 6c), suggesting the intermittent activation of exocytosis. The expression of *SEC5A* and  
407 *RDR6* in *Q. glauca* was already high immediately after flowering in April and rapidly decreased in  
408 May and June (Fig. 6c). In contrast, the expression level of *SEC15b* was low throughout the census  
409 period (Fig. 6c), suggesting that *SEC15b* may be less important for fertilization in *Q. glauca*. Overall,  
410 the consistency of expression dynamics and the onset of ovule development suggest that *SEC5A* and  
411 *RDR6* are candidates for delayed fertilization in *L. edulis*.

412

## 413 **4 Discussion**

414 Our results demonstrate that a seasonal gene-expression signature of delayed fertilization is the  
415 activation of genes involved in fertilization and ovule development in response to low temperatures.  
416 This finding suggests that the two-year fruiting species may have evolved a requirement of winter  
417 cold to prevent fertilization before winter and allow for fertilization and embryo development in the  
418 following spring when temperature rise.

419 Our study also revealed evolutionary conserved mechanisms that facilitate appropriate  
420 physiological responses to seasonal environmental changes. Specifically, genes associated with the  
421 responses to cold stress, photosynthesis, and cell proliferation, which are essential for survival and  
422 growth, show highly conserved seasonal expression profiles regardless of species. This indicates that  
423 comparative transcriptomics in natural settings is a powerful approach for identifying evolutionary  
424 conservation and divergence of physiological responses to environmental changes.

425 Genes that exhibit divergent expression profiles between one- and two-year fruiting species  
426 could potentially be the candidate genes for delayed fertilization. In this study, our focus was on two  
427 genes, *SEC5A*, which encodes a subunit of the exocyst complex, and *RDR6*, which is required for  
428 posttranscriptional silencing. To validate the requirement of winter cold as an adaptive strategy for  
429 adjusting fertilization time, it would be useful to conduct female flower specific transcriptomics to  
430 see if their seasonal gene expression profiles are conserved in the two-year fruiting species and  
431 identify additional candidate genes of delayed fertilization.

432 The exocyst complex plays a critical role during pollen–stigma interactions by mediating the  
433 delivery of Golgi-derived secretory vesicles through vesicular trafficking, tethering, and fusion with

434 the plasma membrane for secretion (Cvrčková et al., 2012; Heider & Munson, 2012). The cargo of  
435 these secretory vesicles is unknown, but candidate cargo could be plasma membrane aquaporins,  
436 which could facilitate water transfer (Safavian & Goring, 2013; Windari et al., 2021) from the  
437 stigmatic papilla to the pollen grain for hydration and cell-wall modifying enzymes for stigmatic  
438 papillar cell wall loosening and pollen tube penetration (Elleman & Dickinson, 1996; Samuel et al.,  
439 2009). In two-year fruiting *Quercus* (*Q. acutissima*, *Q. rubra*, *Q. suber* L., *Q. velutina*) pollen  
440 germinates instantly after pollination to penetrate the stigmatic surface to the stylar transmitting tissue  
441 (Cecich, 1997; Deng et al., 2022). Then, the pollen tube is arrested and overwinters at the style-joining  
442 site until the formation of the rudimentary ovule and embryo sac maturation in the next spring (Cecich,  
443 1997; Deng et al., 2022). Intermittent and delayed activation of *SEC5A* in the pistillate flowers of *L.*  
444 *edulis* with a sharp expression peak after winter (Fig. 6c) implies female-side regulation for the  
445 delivery of secretory vesicles to provide the resources, probably cell-wall modifying enzymes or  
446 signalling molecules, necessary for the resumption of pollen tube growth to fertilize the ovule after a  
447 prolonged postpollination period. It will be interesting future studies to investigate the pollen tube  
448 growth dynamics and exocyst gene expression within the pistil and ovule in various species to  
449 elucidate the role of the exocyst complex in male and female gametophyte communication during the  
450 long journey from the pollen tube.

451 Another candidate for delayed fertilization is *RDR6*, which generates ta-siRNAs that  
452 essentially silence TEs, which are selfish genetic elements that insert copies of themselves into the  
453 genome, during female gametophyte development in *Arabidopsis* (Olmedo-Monfil et al., 2010). In

454 the pistillate flower of *L. edulis*, *RDR6* was highly expressed after winter, which was synchronized  
455 with the timing of female gamete formation and the expression peak of *SEC5A*. These results show  
456 that female gamete formation and pollen–pistil interactions are coordinately regulated in response to  
457 seasonal environmental conditions, particularly the winter cold. ta-siRNAs are mobile signal  
458 molecules that move from somatic cells into adjacent germline cells (Long et al., 2021; Martínez et  
459 al., & Slotkin, 2016; Wu & Zheng, 2019) and even from host plants to fungal pathogens to induce  
460 cross-species RNA interference (Cai et al., 2019; Cai et al., 2018). Because exocysts may participate  
461 in tethering these extracellular vesicles to the plasma membrane (Saeed et al., 2019), it is tempting to  
462 speculate that ta-siRNAs are actively delivered to silence TEs during gametogenesis to protect the  
463 genome of the female gamete or enhance male and female gametophyte communication, probably  
464 for the selection of compatible pollen tubes in Fagaceae with a high degree of self-incompatibility.  
465 To gain a better understanding of how mobile siRNAs function in ovules of Fagaceae and to further  
466 illuminate the roles of siRNAs in delayed fertilization, functional analyses and in-situ hybridization  
467 experiments would be valuable strategies.

468         The long delay in fertilization has long been a mystery in biology. This study offers new  
469 possibilities to explore the evolution of this unique reproductive strategies.

470

## 471 **Acknowledgements**

472 The authors would like to thank Y. Sawasaki and M. Seki for their supports in sample collection, M.  
473 Seki and E. Sasaki for their technical supports with the statistical analysis, and K. Miwa for her



474 valuable comments on our initial draft. We also thank three reviews for their valuable suggestions to  
475 improve our manuscript.

476

## 477 **References**

- 478 Aikawa, S., Kobayashi, M. J., Satake, A., Shimizu, K. K., & Kudoh, H. (2010). Robust control of  
479 the seasonal expression of the Arabidopsis *FLC* gene in a fluctuating environment.  
480 *Proceedings of the National Academy of Sciences*, *107*(25), 11632–11637. doi:  
481 10.1073/pnas.0914293107
- 482 Bellaflore, S., Barneche, F., Peltler, G., & Rochalx, J. D. (2005). State transitions and light  
483 adaptation require chloroplast thylakoid protein kinase STN7. *Nature*, *433*(7028), 892–895.  
484 doi: 10.1038/nature03286
- 485 Benson, M. (1894). Contribution to the embryology of the Amentiferae. Part I. *Transactions of the*  
486 *Linnean Society of London, 2nd Series, Botany*, *3*(R60), 409–424.
- 487 Boavida, L. C., Silva, J. P., & Feijó, J. A. (2011). Sexual reproduction in the cork oak (*Quercus*  
488 *suber* L). II. Crossing intra- and interspecific barriers. *Sexual Plant Reproduction*, *14*(3), 143–  
489 152. doi: 10.1007/s004970100100
- 490 Bolger, A. M., Lohse, M., & Usadel, B. (2014). Trimmomatic: A flexible trimmer for Illumina  
491 sequence data. *Bioinformatics*, *30*(15), 2114–2120. doi: 10.1093/bioinformatics/btu170
- 492 Borgardt, S. J., & Nixon, K. C. (2003). A comparative flower and fruit anatomical study of *Quercus*  
493 *acutissima*, a biennial-fruiting oak from the Cerris group (Fagaceae). *American Journal of*  
494 *Botany*, *90*(11), 1567–1584. doi: 10.3732/ajb.90.11.1567
- 495 Cai, Q., He, B., Weiberg, A., Buck, A. H., & Jin, H. (2019). Small RNAs and extracellular vesicles:  
496 New mechanisms of cross-species communication and innovative tools for disease control.  
497 *PLoS Pathogens*, *15*(12), 1–13. doi: 10.1371/journal.ppat.1008090
- 498 Cai, Q., Qiao, L., Wang, M., He, B., Lin, F., Palmquist, J., & Jin, H. (2018). Pathogen to silence  
499 virulence genes. *Science*, *360*(June), 1126–1129.
- 500 Cecich, R. A. (1997). Pollen tube growth in *Quercus*. *Forest Science*, *43*(1), 140–146.
- 501 Cronn, R., Dolan, P. C., Jogdeo, S., Wegrzyn, J. L., Neale, D. B., St. Clair, J. B., & Denver, D. R.  
502 (2017). Transcription through the eye of a needle: Daily and annual cyclic gene expression  
503 variation in Douglas-fir needles. *BMC Genomics*, *18*(1). doi: 10.1186/s12864-017-3916-y
- 504 Cvrčková, F., Grunt, M., Bezvoda, R., Hála, M., Kulich, I., Rawat, A., & Žárský, V. (2012).  
505 Evolution of the land plant exocyst complexes. *Frontiers in Plant Science*, *3*(JUL), 1–13. doi:  
506 10.3389/fpls.2012.00159
- 507 Darriba, Di., Posada, D., Kozlov, A. M., Stamatakis, A., Morel, B., & Flouri, T. (2020). ModelTest-  
508 NG: A new and scalable tool for the selection of DNA and protein evolutionary models.  
509 *Molecular Biology and Evolution*, *37*(1), 291–294. doi: 10.1093/molbev/msz189

- 510 Deng, M., Yao, K., Shi, C., Shao, W., & Li, Q. (2022). Development of *Quercus acutissima*  
511 (Fagaceae) pollen tubes inside pistils during the sexual reproduction process. *Planta*, *256*(1),  
512 1–15. doi: 10.1007/s00425-022-03937-9
- 513 Dennis, G., Sherman, B. T., Hosack, D. A., Yang, J., Gao, W., Lane, H. C., & Lempicki, R. A.  
514 (2003). DAVID: Database for annotation, visualization, and integrated discovery. *Genome*  
515 *Biology*, *4*(5). doi: 10.1186/gb-2003-4-9-r60
- 516 Edler, D., Klein, J., Antonelli, A., & Silvestro, D. (2021). raxmlGUI 2.0: A graphical interface and  
517 toolkit for phylogenetic analyses using RAxML. *Methods in Ecology and Evolution*, *12*(2),  
518 373–377. doi: 10.1111/2041-210X.13512
- 519 Elleman, C. J., & Dickinson, H. G. (1996). Identification of pollen components regulating  
520 pollination-specific responses in the stigmatic papillae of *Brassica oleracea*. *New Phytologist*,  
521 *133*(2), 197–205. doi: 10.1111/j.1469-8137.1996.tb01886.x
- 522 Emms, D. M., & Kelly, S. (2015). OrthoFinder: solving fundamental biases in whole genome  
523 comparisons dramatically improves orthogroup inference accuracy. *Genome Biology*, *16*(1), 1–  
524 14. doi: 10.1186/s13059-015-0721-2
- 525 Emms, D. M., & Kelly, S. (2019). OrthoFinder: Phylogenetic orthology inference for comparative  
526 genomics. *Genome Biology*, *20*(1), 1–14. doi: 10.1186/s13059-019-1832-y
- 527 Feldman, M. J., Poirier, B. C., & Lange, B. M. (2015). Misexpression of the Niemann-Pick disease  
528 type C1 (NPC1)-like protein in *Arabidopsis* causes sphingolipid accumulation and  
529 reproductive defects. *Planta*, *242*(4), 921–933. doi: 10.1007/s00425-015-2322-4
- 530 Grabherr, M. G., Haas, B. J., Yassour, M., Levin, J. Z., Thompson, D. A., Amit, I., ... Regev, A.  
531 (2011). Full-length transcriptome assembly from RNA-Seq data without a reference genome.  
532 *Nature Biotechnology*, *29*(7), 644–652. doi: 10.1038/nbt.1883
- 533 Guo, W., Roth, D., Walch-Solimena, C., & Novick, P. (1999). The exocyst is an effector for Sec4P,  
534 targeting secretory vesicles to sites of exocytosis. *EMBO Journal*, *18*(4), 1071–1080. doi:  
535 10.1093/emboj/18.4.1071
- 536 Han, S., Green, L., & Schnell, D. J. (2009). The signal peptide peptidase is required for pollen  
537 function in *Arabidopsis*. *Plant Physiology*, *149*(3), 1289–1301. doi: 10.1104/pp.108.130252
- 538 Heider, M. R., & Munson, M. (2012). Exorcising the Exocyst Complex. *Traffic*, *13*(7), 898–907.  
539 doi: 10.1111/j.1600-0854.2012.01353.x
- 540 Huang, C. K., Shen, Y. L., Huang, L. F., Wu, S. J., Yeh, C. H., & Lu, C. A. (2016). The DEAD-box  
541 RNA helicase AtRH7/PRH75 participates in pre-rRNA processing, plant development and  
542 cold tolerance in *Arabidopsis*. *Plant and Cell Physiology*, *57*(1), 174–191. doi:  
543 10.1093/pcp/pcv188
- 544 Jackson, D. A. (1995). Bootstrapped principal components analysis - Reply to Mehlman et al.  
545 *Ecology*, *76*(2), 644–645. doi: 10.2307/1941220
- 546 Jokipii-Lukkari, S., Delhomme, N., Schifffhaller, B., Mannapperuma, C., Prestele, J., Nilsson, O., ...  
547 Tuominen, H. (2018). Transcriptional roadmap to seasonal variation in wood formation of  
548 Norway spruce. *Plant Physiology*, *176*(4), 2851–2870. doi: 10.1104/pp.17.01590

- 549 Kankel, M. W., Ramsey, D. E., Stokes, T. L., Flowers, S. K., Haag, J. R., Jeddloh, J. A., ...  
550 Richards, E. J. (2003). Arabidopsis MET1 cytosine methyltransferase mutants. *Genetics*,  
551 *163*(3), 1109–1122. doi: 10.1093/genetics/163.3.1109
- 552 Kobayashi, M. J., Takeuchi, Y., Kenta, T., Kume, T., Diway, B., & Shimizu, K. K. (2013). Mass  
553 flowering of the tropical tree *Shorea beccariana* was preceded by expression changes in  
554 flowering and drought-responsive genes. *Molecular Ecology*, *22*(18), 4767–4782. doi:  
555 10.1111/mec.12344
- 556 Kriventseva, E. V., Kuznetsov, D., Tegenfeldt, F., Manni, M., Dias, R., Simão, F. A., & Zdobnov,  
557 E. M. (2019). OrthoDB v10: Sampling the diversity of animal, plant, fungal, protist, bacterial  
558 and viral genomes for evolutionary and functional annotations of orthologs. *Nucleic Acids*  
559 *Research*, *47*(D1), D807–D811. doi: 10.1093/nar/gky1053
- 560 Kuang, R., Chan, K. H., Yeung, E., & Lim, B. L. (2009). Molecular and biochemical  
561 characterization of AtPAP15, a purple acid phosphatase with phytase activity, in Arabidopsis.  
562 *Plant Physiology*, *151*(1), 199–209. doi: 10.1104/pp.109.143180
- 563 Kudoh, H. (2016). Molecular phenology in plants: In natura systems biology for the comprehensive  
564 understanding of seasonal responses under natural environments. *New Phytologist*, *210*(2),  
565 399–412. doi: 10.1111/nph.13733
- 566 Kumar, S., Stecher, G., & Tamura, K. (2016). MEGA7: Molecular evolutionary genetics analysis  
567 version 7.0 for bigger datasets. *Molecular Biology and Evolution*, *33*(7), 1870–1874. doi:  
568 10.1093/molbev/msw054
- 569 Liu, Y., Tabata, D., & Imai, R. (2016). A cold-inducible DEAD-box RNA helicase from  
570 *Arabidopsis thaliana* regulates plant growth and development under low temperature. *PLoS*  
571 *ONE*, *11*(4), 1–21. doi: 10.1371/journal.pone.0154040
- 572 Long, J., Walker, J., She, W., Aldridge, B., Gao, H., Deans, S., ... Feng, X. (2021). Nurse cell-  
573 derived small RNAs define paternal epigenetic inheritance in Arabidopsis. *Science*, *373*(6550).  
574 doi: 10.1126/science.abh0556
- 575 Lu, H., Gordon, M. I., Amarasinghe, V., & Strauss, S. H. (2020). Extensive transcriptome changes  
576 during seasonal leaf senescence in field-grown black cottonwood (*Populus trichocarpa*  
577 *Nisqually-1*). *Scientific Reports*, *10*(1), 1–14. doi: 10.1038/s41598-020-63372-2
- 578 Manos, P. S., & Stanford, A. M. (2001). The historical biogeography of Fagaceae: Tracking the  
579 tertiary history of temperate and subtropical forests of the Northern Hemisphere. *International*  
580 *Journal of Plant Sciences*, *162*(6 SUPPL.), S77–S93. doi: 10.1086/323280
- 581 Martínez, G., Panda, K., Köhler, C., & Slotkin, R. K. (2016). Silencing in sperm cells is directed by  
582 RNA movement from the surrounding nurse cell. *Nature Plants*, *2*(4). doi:  
583 10.1038/NPLANTS.2016.30
- 584 Miyazaki, Y., Maruyama, Y., Chiba, Y., Kobayashi, M. J., Joseph, B., Shimizu, K. K., ... Satake,  
585 A. (2014). Nitrogen as a key regulator of flowering in *Fagus crenata*: Understanding the  
586 physiological mechanism of masting by gene expression analysis. *Ecology Letters*, *17*(10),  
587 1299–1309. doi: 10.1111/ele.12338

- 588 Miyazaki, Y., & Satake, A. (2017). Relationship between seasonal progression of floral meristem  
589 development and *FLOWERING LOCUS T* expression in the deciduous tree *Fagus crenata*.  
590 *Ecological Research*, 32(4), 627–631. doi: 10.1007/s11284-017-1462-3
- 591 Mizuno, S., Osakabe, Y., Maruyama, K., Ito, T., Osakabe, K., Sato, T., ... Yamaguchi-Shinozaki,  
592 K. (2007). Receptor-like protein kinase 2 (RPK 2) is a novel factor controlling anther  
593 development in *Arabidopsis thaliana*. *Plant Journal*, 50(5), 751–766. doi: 10.1111/j.1365-  
594 313X.2007.03083.x
- 595 N Saitou, M. N. (1987). The neighbor-joining method: a new method for reconstructing  
596 phylogenetic trees. *Molecular Biol Ogy and Evolution*, 4(4), 406–425. doi: doi: 10.1093/  
597 Nagano, A. J., Kawagoe, T., Sugisaka, J., Honjo, M. N., Iwayama, K., & Kudoh, H. (2019). Annual  
598 transcriptome dynamics in natural environments reveals plant seasonal adaptation. *Nature*  
599 *Plants*, 5(1), 74–83. doi: 10.1038/s41477-018-0338-z
- 600 Nagano, A. J., Sato, Y., Mihara, M., Antonio, B. A., Motoyama, R., Itoh, H., ... Izawa, T. (2012).  
601 Deciphering and prediction of transcriptome dynamics under fluctuating field conditions. *Cell*,  
602 151(6), 1358–1369. doi: 10.1016/j.cell.2012.10.048
- 603 Nishimura, K., & Van Wijk, K. J. (2015). Organization, function and substrates of the essential Clp  
604 protease system in plastids. *Biochimica et Biophysica Acta - Bioenergetics*, 1847(9), 915–930.  
605 doi: 10.1016/j.bbabi.2014.11.012
- 606 Olmedo-Monfil, V., Durán-Figueroa, N., Arteaga-Vázquez, M., Demesa-Arévalo, E., Autran, D.,  
607 Grimanelli, D., ... Vielle-Calzada, J. P. (2010). Control of female gamete formation by a small  
608 RNA pathway in *Arabidopsis*. *Nature*, 464(7288), 628–632. doi: 10.1038/nature08828
- 609 Osakabe, K., Abe, K., Yoshioka, T., Osakabe, Y., Todoriki, S., Ichikawa, H., ... Toki, S. (2006).  
610 Isolation and characterization of the *RAD54* gene from *Arabidopsis thaliana*. *Plant Journal*,  
611 48(6), 827–842. doi: 10.1111/j.1365-313X.2006.02927.x
- 612 Peragine, A., Yoshikawa, M., Wu, G., Albrecht, H. L., & Poethig, R. S. (2004). SGS3 and  
613 SGS2/SDE1/RDR6 are required for juvenile development and the production of trans-acting  
614 siRNAs in *Arabidopsis*. *Genes and Development*, 18(19), 2368–2379. doi:  
615 10.1101/gad.1231804
- 616 Peres-Neto, P. R., Jackson, D. A., & Somers, K. M. (2003). Giving meaningful interpretation to  
617 ordination axes: Assessing loading significance in principal component analysis. *Ecology*,  
618 84(9), 2347–2363. doi: 10.1890/00-0634
- 619 Pfaffl, M. W. (2001). A new mathematical model for relative quantification in real-time RT-PCR.  
620 *Nucleic Acids Research*, 29(9), E45. doi: 10.1093/NAR/29.9.E45
- 621 Richards, C. L., Rosas, U., Banta, J., Bhambhra, N., & Purugganan, M. D. (2012). Genome-wide  
622 patterns of *Arabidopsis* gene expression in nature. *PLoS Genetics*, 8(4). doi:  
623 10.1371/journal.pgen.1002662
- 624 Saeed, B., Brillada, C., & Trujillo, M. (2019). Dissecting the plant exocyst. *Current Opinion in*  
625 *Plant Biology*, 52, 69–76. doi: 10.1016/j.pbi.2019.08.004

- 626 Safavian, D., & Goring, D. R. (2013). Secretory activity is rapidly induced in stigmatic papillae by  
627 compatible pollen, but inhibited for self-incompatible pollen in the brassicaceae. *PLoS ONE*,  
628 8(12). doi: 10.1371/journal.pone.0084286
- 629 Safavian, D., Zayed, Y., Indriolo, E., Chapman, L., Ahmed, A., & Goring, D. R. (2015). RNA  
630 silencing of exocyst genes in the stigma impairs the acceptance of compatible pollen in  
631 arabidopsis. *Plant Physiology*, 169(4), 2526–2538. doi: 10.1104/pp.15.00635
- 632 Samuel, M. A., Chong, Y. T., Haasen, K. E., Aldea-Brydges, M. G., Stone, S. L., & Goring, D. R.  
633 (2009). Cellular pathways regulating responses to compatible and self-incompatible pollen in  
634 brassica and arabidopsis stigmas intersect at *exo70a1*, a putative component of the exocyst  
635 complex. *Plant Cell*, 21(9), 2655–2671. doi: 10.1105/tpc.109.069740
- 636 Satake, A., Kawagoe, T., Saburi, Y., Chiba, Y., Sakurai, G., & Kudoh, H. (2013). Forecasting  
637 flowering phenology under climate warming by modelling the regulatory dynamics of  
638 flowering-time genes. *Nature Communications*, 4, 1–8. doi: 10.1038/ncomms3303
- 639 Satake, A., Kawatsu, K., Teshima, K., Kabeya, D., & Han, Q. (2019). Field transcriptome revealed  
640 a novel relationship between nitrate transport and flowering in Japanese beech. *Scientific*  
641 *Reports*, 9(1), 1–12. doi: 10.1038/s41598-019-39608-1
- 642 Satake, A., & Kelly, D. (2021). Delayed fertilization facilitates flowering time diversity in  
643 Fagaceae. *Philosophical Transactions of the Royal Society B: Biological Sciences*, 376(1839),  
644 20210115. doi: 10.1098/rstb.2021.0115
- 645 Satake, A., Nagahama, A., & Sasaki, E. (2022). A cross-scale approach to unravel the molecular  
646 basis of plant phenology in temperate and tropical climates. *New Phytologist*, 233(6), 2340–  
647 2353. doi: 10.1111/nph.17897
- 648 Sjögren, L. L. E., MacDonald, T. M., Sutinen, S., & Clarke, A. K. (2004). Inactivation of the *clpC1*  
649 gene encoding a chloroplast Hsp100 molecular chaperone causes growth retardation, leaf  
650 chlorosis, lower photosynthetic activity, and a specific reduction in photosystem content. *Plant*  
651 *Physiology*, 136(4), 4114–4126. doi: 10.1104/pp.104.053835
- 652 Sogo, A., & Tobe, H. (2006). Delayed fertilization and pollen-tube growth in pistils of *Fagus*  
653 *japonica* (Fagaceae). *American Journal of Botany*, 93(12), 1748–1756. doi:  
654 10.3732/ajb.93.12.1748
- 655 Stamatakis, A. (2014). RAxML version 8: A tool for phylogenetic analysis and post-analysis of  
656 large phylogenies. *Bioinformatics*, 30(9), 1312–1313. doi: 10.1093/bioinformatics/btu033
- 657 Storey, J. D. (2002). A direct approach to false discovery rates. *Journal of the Royal Statistical*  
658 *Society. Series B: Statistical Methodology*, 64(3), 479–498. doi: 10.1111/1467-9868.00346
- 659 Williams, J. H. (2008). Novelty of the flowering plant pollen tube underlie diversification of a key  
660 life history stage. *Proceedings of the National Academy of Sciences of the United States of*  
661 *America*, 105(32), 11259–11263. doi: 10.1073/pnas.0800036105
- 662 Windari, E. A., Ando, M., Mizoguchi, Y., Shimada, H., Ohira, K., Kagaya, Y., ... Suwabe, K.  
663 (2021). Two aquaporins, *sip1;1* and *pip1;2*, mediate water transport for pollen hydration in the  
664 arabidopsis pistil. *Plant Biotechnology*, 38(1), 77–87. doi:  
665 10.5511/plantbiotechnology.20.1207a

- 666 Wu, W., & Zheng, B. (2019). Intercellular delivery of small RNAs in plant gametes. *New*  
667 *Phytologist*, *224*(1), 86–90. doi: 10.1111/nph.15854
- 668 Yano, R., Nakamura, M., Yoneyama, T., & Nishida, I. (2005). Starch-related  $\alpha$ -glucan/water  
669 dikinase is involved in the cold-induced development of freezing tolerance in Arabidopsis.  
670 *Plant Physiology*, *138*(2), 837–846. doi: 10.1104/pp.104.056374
- 671 Yeoh, S. H., Satake, A., Numata, S., Ichie, T., Lee, S. L., Basherudin, N., ... Tani, N. (2017).  
672 Unravelling proximate cues of mass flowering in the tropical forests of South-East Asia from  
673 gene expression analyses. *Molecular Ecology*, *26*(19), 5074–5085. doi: 10.1111/mec.14257
- 674 Yoshikawa, M., Peragine, A., Mee, Y. P., & Poethig, R. S. (2005). A pathway for the biogenesis of  
675 trans-acting siRNAs in Arabidopsis. *Genes and Development*, *19*(18), 2164–2175. doi:  
676 10.1101/gad.1352605
- 677 Yu, T. S., Kofler, H., Häusler, R. E., Hille, D., Flügge, U. I., Zeeman, S. C., ... Weber, A. (2001).  
678 The Arabidopsis *sex1* mutant is defective in the R1 protein, a general regulator of starch  
679 degradation in plants, and not in the chloroplast hexose transporter. *Plant Cell*, *13*(8), 1907–  
680 1918. doi: 10.1105/tpc.13.8.1907
- 681 Zhou, B. F., Yuan, S., Crowl, A. A., Liang, Y. Y., Shi, Y., Chen, X. Y., ... Wang, B. (2022).  
682 Phylogenomic analyses highlight innovation and introgression in the continental radiations of  
683 Fagaceae across the Northern Hemisphere. *Nature Communications*, *13*(1), 1–14. doi:  
684 10.1038/s41467-022-28917-1

685

#### 686 **Data Accessibility and Benefit-Sharing**

687 The sequence data and DNA microarray data that support the findings of this study are available  
688 from the NCBI BioProject (accession PRJNA872835 for *Q. glauca* and PRJNA872836 for *L.*  
689 *edulis*), the NCBI Shotgun Assembly Sequence Database (TSA) (accession GKBD00000000 for *Q.*  
690 *glauca* and GKBC00000000 for *L. edulis*), and the NCBI GEO database (accession GSE211382,  
691 GSE211384, and GSE211385). Benefits from this research accrue from the sharing of our data and  
692 results on public databases as described above.

693

#### 694 **Author contributions**

695 A.S. conceived of and designed the analysis; K.O. and A.S. collected samples; and K.O. performed  
696 the molecular experiments. K.J. and A.S. analysed the data; N.T. and K.T. performed anatomical  
697 observation of ovules. A.S. wrote the paper with input from all of the authors. This study was funded  
698 by JSPS KAKENHI (JP17H01449, JP21H04781) to A.S.

699

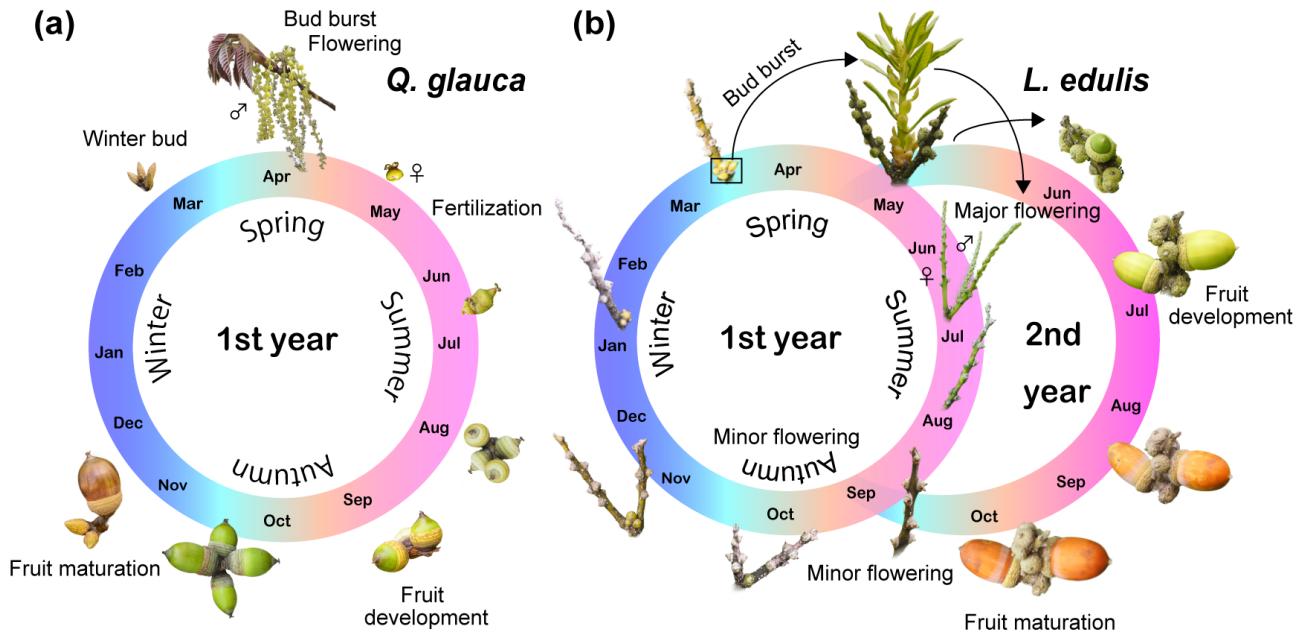

700

701 **FIGURE 1 Comparison of flowering and fruiting phenology of *Q. glauca* and *L. edulis*.** (a) A  
702 one-year fruiting species, *Q. glauca*, starts blooming in April and fruits in the autumn in the same  
703 year as anthesis. (b) A two-year fruiting species, *L. edulis*, begins flowering mainly in June with a  
704 minor flowering event in fall and fruits in the next year after flowering.

705

706

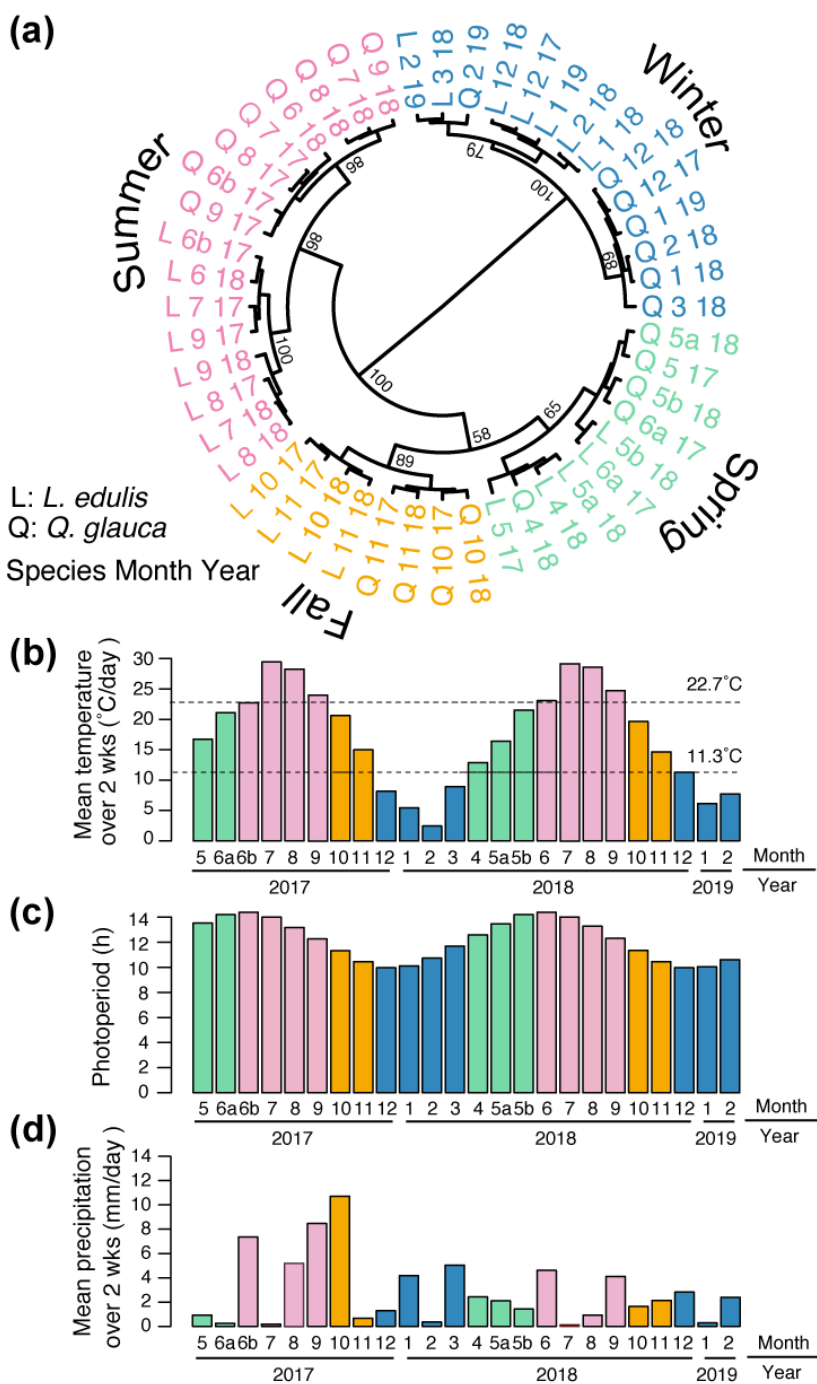

707

708 **FIGURE 2 Molecular phenology and seasonal environmental changes.** (a) Hierarchical clustering  
 709 of monthly transcriptome profiles of tissues including leaves and buds in *Q. glauca* (Q) and *L. edulis*  
 710 (L). The numbers indicate the month and year when each sample was collected. When sampling was  
 711 performed twice a year, the month is distinguished by a or b (Table S1). The number given to each  
 712 branch represents the bootstrap confidence level from 1,000 bootstrap samples. (b) The mean  
 713 temperature over two weeks before the sampling dates. Dashed lines represent 22.7 °C, above which  
 714 temperature the summer profiles in gene expression emerge, and 11.3 °C, below which temperature  
 715 the winter profiles in gene expression emerge. (c) The photoperiod on sampling dates. (d) The mean  
 716 precipitation over two weeks before the sampling dates. The colours in Panels (b), (c), and (d) indicate  
 717 the gene expression profiles for winter (blue), spring (green), summer (pink), and fall (orange), which  
 718 are consistent with those in Panel (a).



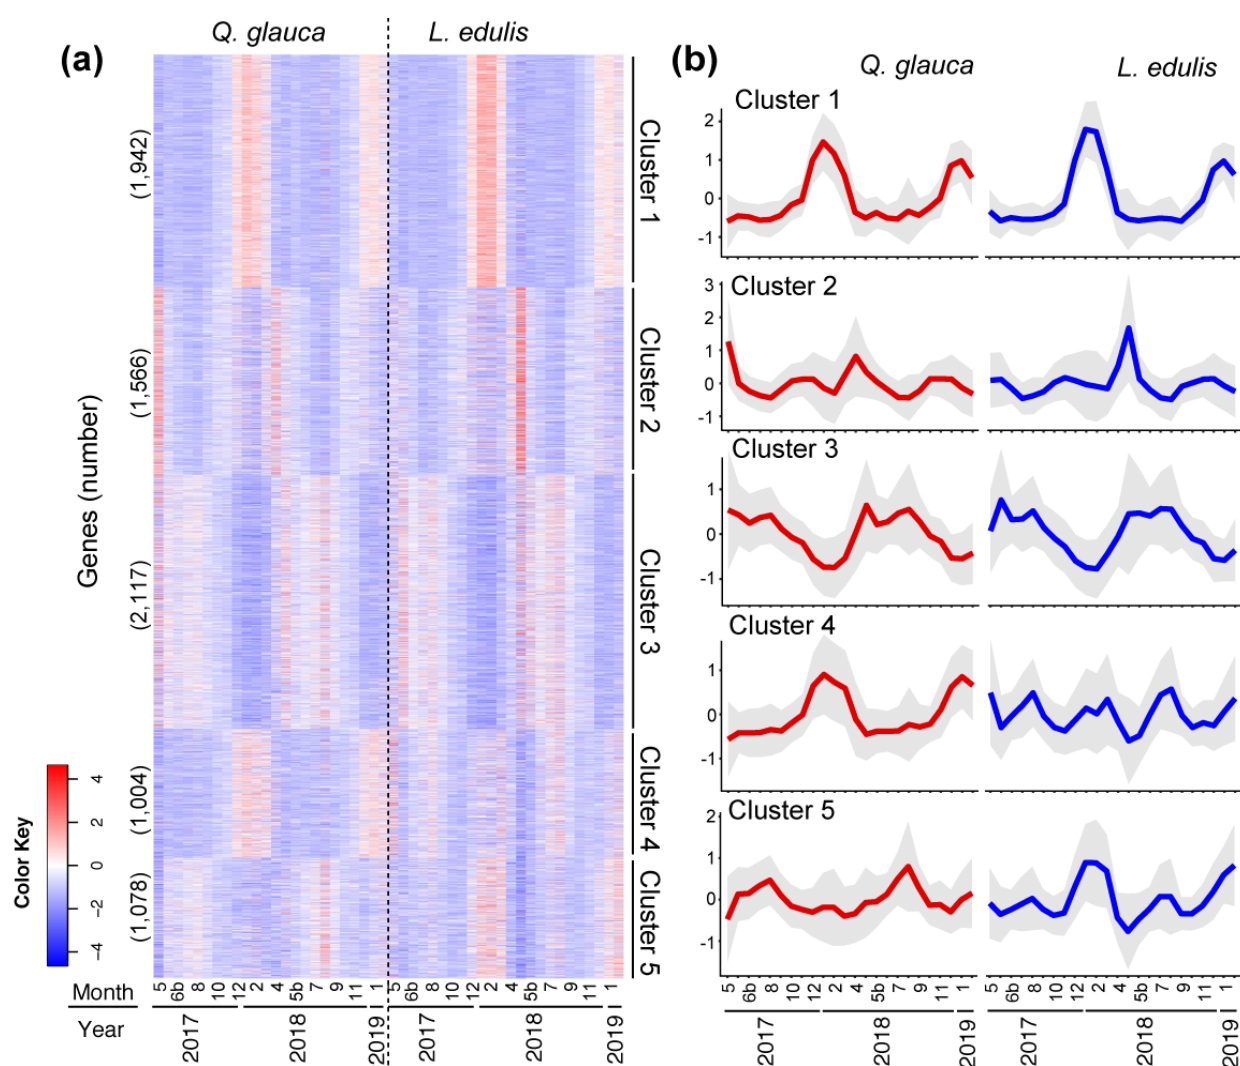

719

720 **FIGURE 3 Five representative clusters for seasonal expression profiles of 7,707 orthologues.** (a)  
721 A hierarchically clustered heatmap of seasonal expression profiles of 7,707 orthologues in tissues  
722 including leaves and buds. The numbers in brackets indicate the number of genes included in each  
723 cluster. (b) Seasonal expression profiles of genes in each of the five clusters. The average (line)  $\pm$  s.d.  
724 (envelope) is shown ( $n = 1,942, 1,556, 2,117, 1,004, \text{ and } 1,078$  for Cluster 1–5, respectively).

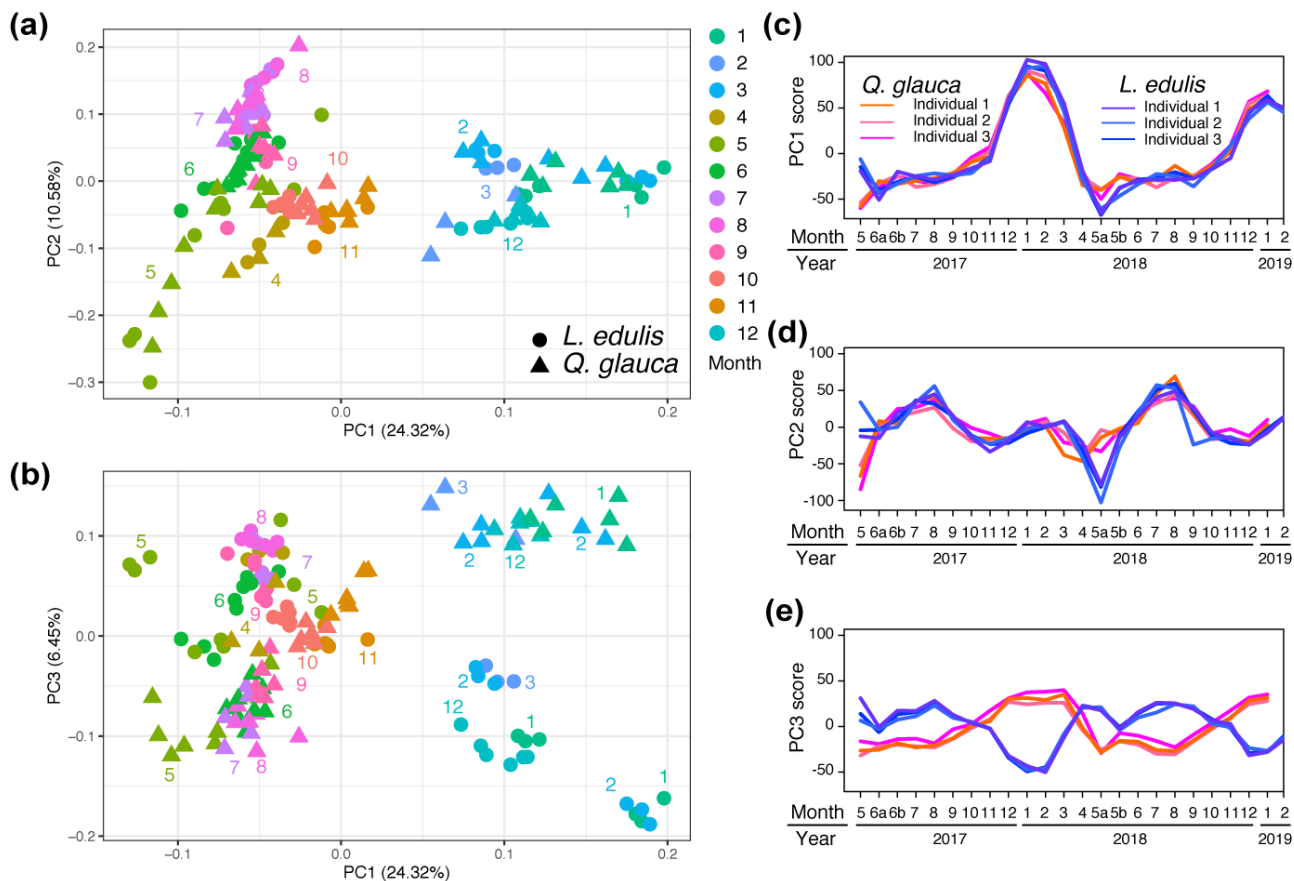

725

726 **FIGURE 4 Major axes of multivariate molecular phenology in *Q. glauca* and *L. edulis*.** Plot of  
 727 PC2 versus PC1 (a) and PC3 versus PC1 (b) resulting from the PCA of the 7,707 orthologues for  
 728 three individuals per species (triangle: *Q. glauca*, circle: *L. edulis*). The numbers indicate the  
 729 sampling month. The numbers in brackets represent the explained variance. Plot of the PC1 score (c),  
 730 PC2 score (d), and PC3 score (e) against the month. Expression profiles were monitored in tissues  
 731 including leaves and buds.

732

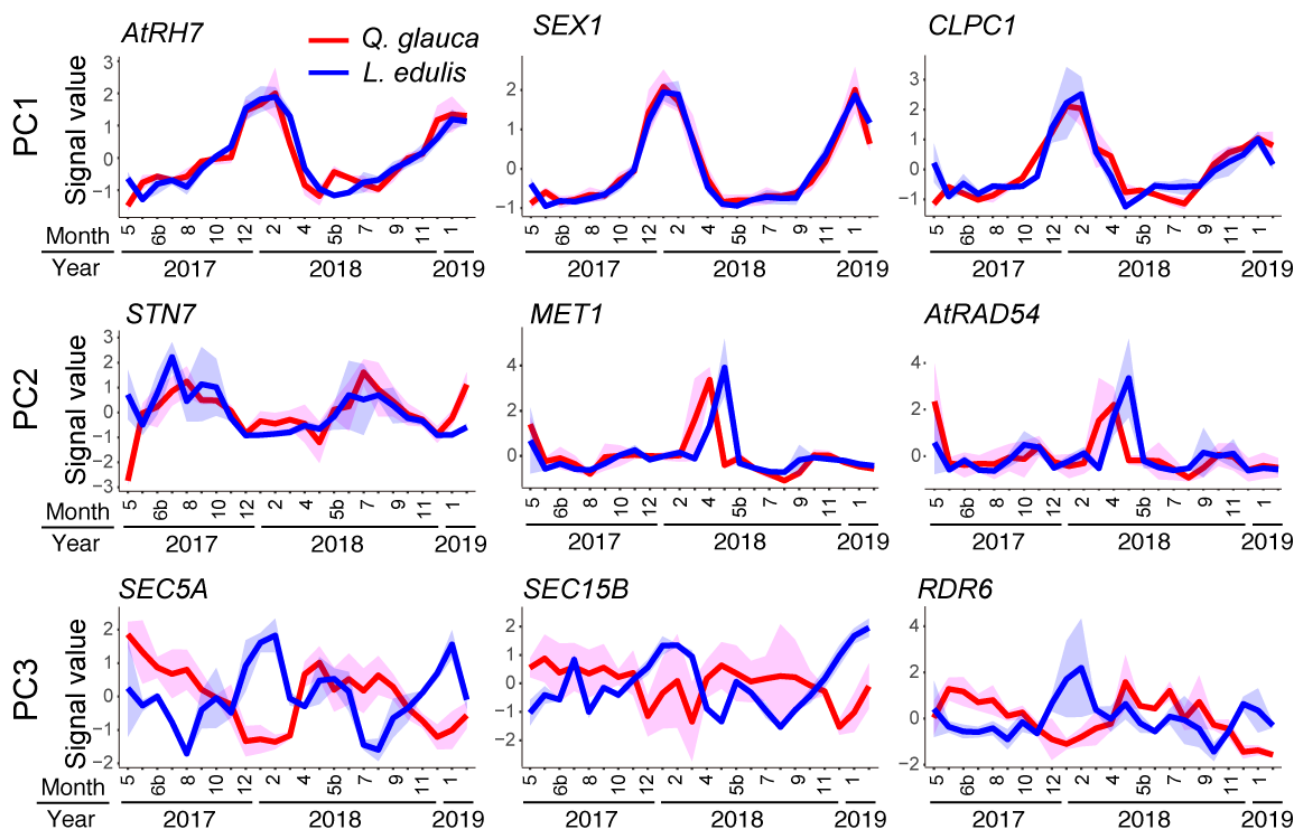

733

734

735 **FIGURE 5 Seasonal expression profiles of genes that characterize each of the three axes.** Three  
736 genes were selected for each of the three axes as examples: PC1 (*AtRH7*, *SEX1*, and *CLPC1*), PC2  
737 (*STN7*, *MET1*, and *AtRAD54*), and PC3 (*SEC5A*, *SEC15B*, and *RDR6*). The two lines indicate signal  
738 values for *Q. glauca* (red) and *L. edulis* (blue). The average (line)  $\pm$  s.d. (envelope) is shown ( $n = 3$ ).  
739 Expression profiles were monitored in tissues including leaves and buds.

740

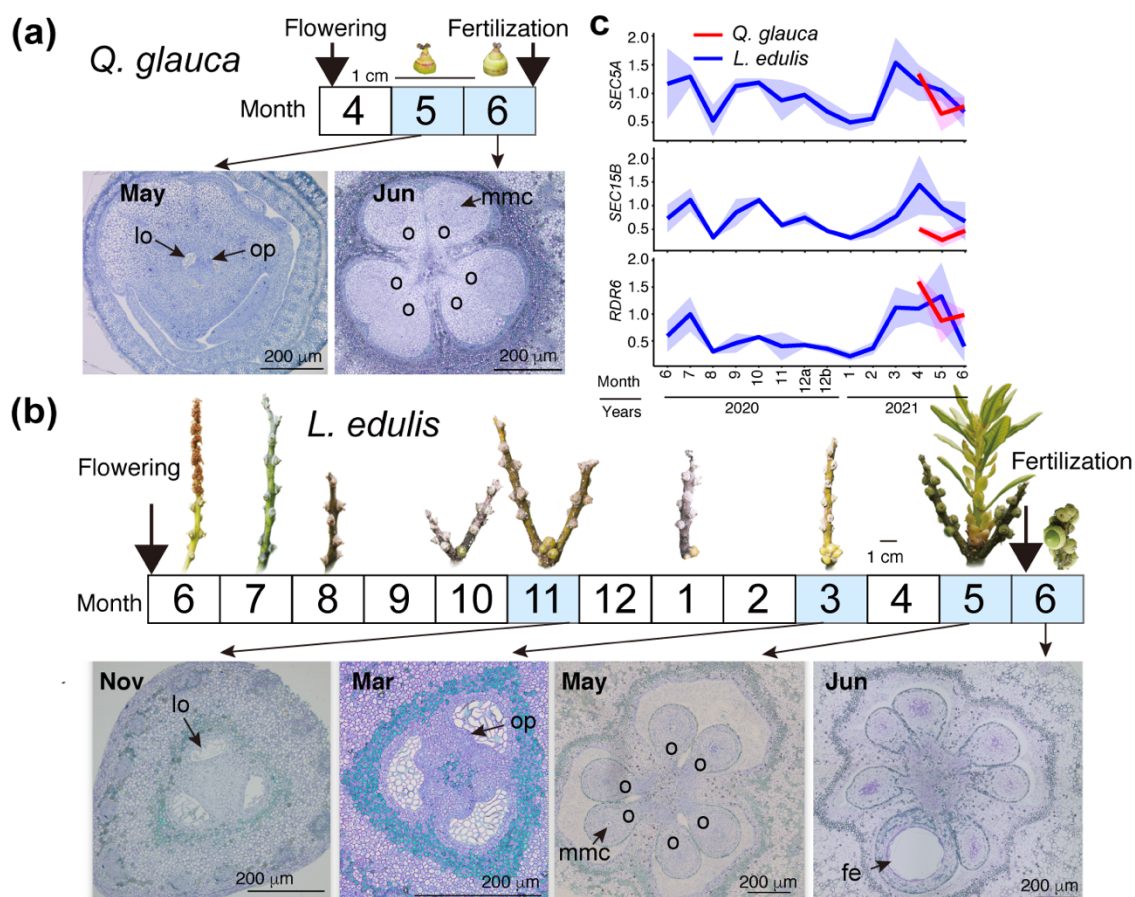

741

742 **FIGURE 6 Ovule development and expression dynamics of candidate genes.** Transverse sections  
 743 of ovules and image of pistillate flowers of *Q. glauca* (a) and *L. edulis* (b) collected on November 11  
 744 in 2018 and March 10, May 23, June 6 in 2019. lo: locule, op: ovule primordia, mms: megaspore  
 745 mother cell, o: ovule, fe: fertilized egg. c, Relative expression levels of *SEC5A*, *SEC15B*, and *RDR6*  
 746 (average  $\pm$  s.d. of three replicates) for *Q. glauca* (red) and *L. edulis* (blue) during 2020–2021 against  
 747 *UBQ10* as a housekeeping gene.

748
